# Supplementary material for: The role of PKAc1 in gene regulation and trichodimerol production in Trichoderma reesei
Source: PubMed Central journal article supplement (PMC6734591; doi:10.1186/s40694-019-0075-8), 2019-09-10
Supplement: 40694_2019_75_MOESM5_ESM.pdf [file 40694_2019_75_MOESM5_ESM.pdf]

# The role of PKAc1 in gene regulation and trichodimerol production in *Trichoderma reesei*

Wolfgang Hinterdobler<sup>1</sup>, André Schuster<sup>2</sup>, Doris Tisch<sup>2</sup>, Ezgi Özkan<sup>1,3</sup>, Johann Schinnerl<sup>4</sup>, Lothar Brecker<sup>5</sup>, Stefan Böhmendorfer<sup>3</sup>, and Monika Schmoll<sup>1\*</sup>

## SUPPLEMENTARY MATERIAL

Figure S1

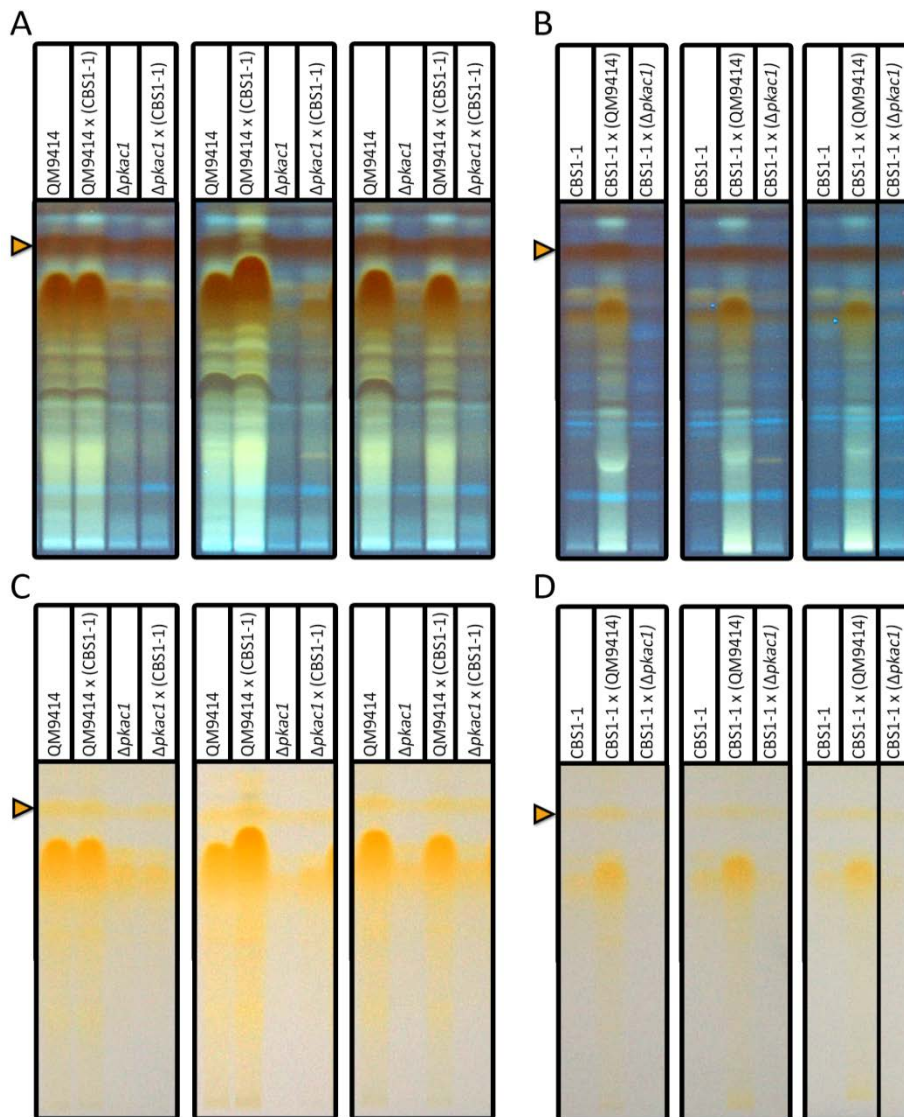

Figure S1. **Biological replicates of high performance thin layer chromatography (HPTLC) analyses.** Triangles show trichodimerol. Secondary metabolite patterns of  $\Delta pkac1$  and wildtype QM9414 under asexual and crossing conditions (A, C) and reaction of CBS1-1 (B, D) after 14 days on 2 % MEX at 22 °C, LD. Visualization: (A, B) fluorescence at 366 nm, (C, D) visible light. Third replicate (right) was measured in a different sequence order for closer comparison between samples and is therefore shifted in (A, C) and one lane removed (indicated by black line) in (B, D). Samples from three petri dishes were pooled for each replicate.
